# Supplementary material for: Cardiovascular and Autonomic Phenotypes Reveal Distinct Mechanisms of Sepsis Decompensation via Deep Learning
Source: Research Square preprint supplement (doi:10.21203/rs.3.rs-9136766/v1), 2026-03-23
Supplement: Supplementary file 1 [file d901959c9b312c20f311a2bc.pdf]

1 **SUPPLEMENTAL DOCUMENT**

2  
3 **Cardiovascular and Autonomic Phenotypes Reveal Distinct Mechanisms of Sepsis**  
4 **Decompensation via Deep Learning**

5  
6  
7 Tilendra Choudhary (PhD), Haoming Shi (MS), Ayman Ali (MD), Victor Moas (MD), Omer T. Inan (PhD), Mihai  
8 V. Podgoreanu (MD), Vijay Krishnamoorthy (MD, MPH, PhD), Craig Jabaley (MD), Craig M. Coopersmith (MD),  
9 Michael R. Pinsky (MD), Gilles Clermont (MD), Rishikesan Kamaleswaran (PhD)

10  
11  
12 **Online Data Supplement Information**

13  
14  
15 **Supplemental Table E1.** Summary of selected ECG-derived physiometers after the preprocessing step in our study.  
16 Abbreviations – F.N.: feature number; Summary statistics: m = mean; p25 = 25th percentile; p75 = 75th percentile; s  
17 = skewness; e = entropy. .... Page 3

18 **Supplemental Table E2.** Summary of selected HRV-based physiometers after the preprocessing step in our study.  
19 Abbreviations – F.N.: feature number; Summary statistics: m = mean; p25 = 25th percentile; p75 = 75th percentile; s  
20 = skewness; e = entropy. .... Page 3

21 **Supplemental Table E3.** Summary of selected PPG-derived physiometers after the preprocessing step in our study.  
22 Abbreviations – F.N.: feature number; Summary statistics: m = mean; p25 = 25th percentile; p75 = 75th percentile; s  
23 = skewness; e = entropy. .... Page 4

24 **Supplemental Table E4.** Summary of selected RESP-derived physiometers and physiologic covariates after the  
25 preprocessing step in our study. Abbreviations – F.N.: feature number; Summary statistics: m = mean; p25 = 25th  
26 percentile; p75 = 75<sup>th</sup> percentile; s = skewness; e = entropy. .... Page 5

27 **Supplemental Figure E1:** Training/validation losses and learning rate schedule plot for the FT-T encoder. ... Page 6

28 **Supplemental Section E1.** Data Representation or Transformation Techniques for Comparison ..... Page 6

29 **Supplemental Figure E2:** Comparison of consensus matrices obtained using different data transformation approaches  
30 for identifying the most stable clustering solution (K=4). (a) The ideal consensus matrix (perfect block-diagonal  
31 structure) and its corresponding histogram, representing maximum stability where samples are consistently assigned  
32 to the same cluster across subsampling iterations. (b) Consensus matrices and histograms for four transformation  
33 methods: FT-T Encoder (highlighted as the closest to ideal), No transformation, PCA-transformed, and DVAE  
34 Encoder. The FT-T Encoder yields the sharpest block-diagonal pattern and a histogram with the most concentration  
35 near consensus values of 0 and 1, indicating superior clustering stability. .... Page 7

36 **Supplemental Figure E3.** Radar diagrams showing variability in demographic variables (age, sex, race, ethnicity)  
37 and mortality outcomes (in %) across different phenotypes. .... Page 8

38 **Supplemental Figure E4.** Shapley Additive exPlanations (SHAP) beeswarm plots highlighting the dominant features  
39 to characterize each of the four clusters as phenotypes. It presents SHAP plots for (a) phenotype SP-1, (b) phenotype  
40 SP-2, (c) phenotype SP-3, and (d) phenotype SP-4. .... Page 9

41 **Supplemental Figure E5.** Performance of an XGBoost-based ML classifier built on the data for predicting multiclass  
42 phenotypes, with ROC curves and precision-recall curves (PRC) showing their respective areas (AUROC and  
43 AUPRC). This further illustrates the comparison of various data representation methods in terms of cluster separability  
44 via AUROC and AUPRC. FT-T encoder-based approach outperforms others. (a) Phenotype distribution, (b) ROC  
45 curves, and (c) PRC curves. .... Page 10

46 **Supplemental Figure E6.** Performance of ML model for phenotype prediction in terms of (a) normalized confusion  
47 matrix, and (b) classification metrics. .... Page 10

48 **Supplemental Table E5.** Baseline comorbidity analysis with the Charlson Comorbidity Index (CCI) based on all  
49 ICD-10 diagnosis codes prior to the zero-point of our study. .... Page 11

50 **Supplemental Table E6.** Lab values after sepsis-3 onset up to 24 hours in mean (standard deviation) format.  
51 ..... Page 12

52 **Supplemental Section E2.** Domain-specific prompt supplied to the LLM-based PIA agent for phenotype  
53 interpretation and generating a concise clinical report. .... Page 12

54 **Supplemental Table E7.** Phenotype characterization provided by the LLM-based PIA agent on phenotype name,  
55 interpretation, and clinical characteristics. .... Page 22

56 **Supplemental Section E3.** HRV Magnitude Versus Complexity as Distinct Physiological Constructs in Derived  
57 Sepsis Phenotypes. .... Page 25

58 **Supplemental Section E4.** Physiological Scope of PPG-Derived Features. .... Page 26

59

60

61

62

63

64

65

66

67

68

69

70 **Supplemental Table E1.** Summary of selected ECG-derived physiomarkers after the preprocessing step in our study.  
71 Abbreviations – F.N.: feature number; Summary statistics: m = mean; p25 = 25th percentile; p75 = 75th percentile; s  
72 = skewness; e = entropy.

| F.N.  | Selected Base Feature (stats)         | Description                             | Unit        |
|-------|---------------------------------------|-----------------------------------------|-------------|
| 1–5   | ECG_T_rr_ms (m, p25, p75, s, e)       | RR interval between successive R-peaks  | ms          |
| 6     | ECG_HR_bpm (s)                        | Asymmetry of heart rate distribution    | bpm         |
| 7–11  | ECG_edr_rate_Bpm (m, p25, p75, s, e)  | ECG-derived respiratory rate            | breaths/min |
| 12–14 | ECG_atrialSys_phase (m, s, e)         | Temporal phase of atrial systole        | ms          |
| 15–19 | ECG_ventSys_phase (m, p25, p75, s, e) | Temporal phase of ventricular systole   | ms          |
| 20–22 | ECG_P_duration (m, s, e)              | Duration of P wave                      | ms          |
| 23–25 | ECG_QRS_duration (m, s, e)            | Duration of QRS complex                 | ms          |
| 26–28 | ECG_T_duration (m, s, e)              | Duration of T wave                      | ms          |
| 29–31 | ECG_pr_interval_ms (m, s, e)          | PR interval duration                    | ms          |
| 32–35 | ECG_pr_segment_ms (m, p25, s, e)      | PR segment duration                     | ms          |
| 36–37 | ECG_st_interval_ms (s, e)             | ST interval variability                 | ms          |
| 38–40 | ECG_st_segment_ms (m, s, e)           | ST segment duration                     | ms          |
| 41–44 | ECG_qt_interval_ms (m, p75, s, e)     | QT interval duration                    | ms          |
| 45    | ECG_ecgBeatCenterFreq                 | Center frequency of ECG beat morphology | Hz          |
| 46–48 | ECG_ecgInterbeat_eigval1–3            | Inter-beat ECG morphology eigenvalues   | unitless    |

73

74 **Supplemental Table E2.** Summary of selected HRV-based physiomarkers after the preprocessing step in our study.  
75 Abbreviations – F.N.: feature number; Summary statistics: m = mean; p25 = 25th percentile; p75 = 75th percentile; s  
76 = skewness; e = entropy.

| F.N.  | Selected Base Feature   | Description                        | Unit            |
|-------|-------------------------|------------------------------------|-----------------|
| 49    | HRV_rqa_REC             | Recurrence rate (RQA)              | unitless        |
| 50    | HRV_rqa_DET             | Determinism (RQA)                  | unitless        |
| 51    | HRV_rqa_LAM             | Laminarity (RQA)                   | unitless        |
| 52    | HRV_SDNN                | Global NN variability              | ms              |
| 53    | HRV_SDANN1              | Long-term HRV (1-min)              | ms              |
| 54    | HRV_SDNNI1              | Short-term HRV (1-min)             | ms              |
| 55    | HRV_MadNN               | Robust NN dispersion               | ms              |
| 56    | HRV_MCVNN               | Median coefficient of variation    | %               |
| 57    | HRV_IQRNN               | Interquartile NN variability       | ms              |
| 58    | HRV_SDRMSSD             | Long-/short-term variability ratio | unitless        |
| 59    | HRV_Prc80NN             | Upper-tail NN percentile           | ms              |
| 60    | HRV_pNN50               | High-frequency variability         | %               |
| 61–62 | HRV_MinNN / MaxNN       | Extreme NN intervals               | ms              |
| 63    | HRV_HTI                 | HRV triangular index               | unitless        |
| 64    | HRV_TINN                | NN histogram width                 | ms              |
| 65–68 | HRV_VLF / LF / HF / VHF | Spectral HRV power bands           | ms <sup>2</sup> |
| 69    | HRV_TP                  | Total spectral power               | ms <sup>2</sup> |
| 70    | HRV_LFHF                | Sympathovagal balance              | unitless        |
| 71–72 | HRV_LFn / HFn           | Normalized spectral power          | %               |

| F.N.    | Selected Base Feature                | Description                         | Unit            |
|---------|--------------------------------------|-------------------------------------|-----------------|
| 73      | HRV_LnHF                             | Log HF power                        | unitless        |
| 74      | HRV_SD1SD2                           | Poincaré variability ratio          | unitless        |
| 75      | HRV_S                                | Poincaré ellipse area               | ms <sup>2</sup> |
| 76      | HRV_CVI                              | Cardiac vagal index                 | unitless        |
| 77      | HRV_PIP                              | Phase-rectified index               | unitless        |
| 78–79   | HRV_PSS / PAS                        | Spectral slope and asymmetry        | unitless        |
| 80      | HRV_GI                               | Gini index of NN                    | unitless        |
| 81–83   | HRV_SI / AI / PI                     | Nonlinear symmetry indices          | unitless        |
| 84–86   | HRV_C1d / C2d / Cd                   | Chaos-based indices                 | unitless        |
| 87–88   | HRV_DFA_alpha1 / alpha2              | Scaling exponents                   | unitless        |
| 89–95   | HRV_MFDFA_alpha1_*                   | Multifractal short-term descriptors | unitless        |
| 96–103  | HRV_MFDFA_alpha2_*                   | Multifractal long-term descriptors  | unitless        |
| 104–107 | HRV_ApEn / SampEn / ShanEn / FuzzyEn | Entropy measures                    | unitless        |
| 108–109 | HRV_MSEn / CMSEn                     | Multiscale entropy                  | unitless        |
| 110–113 | HRV_CD / HFD / KFD / LZC             | Fractal & symbolic complexity       | unitless        |

77

78 **Supplemental Table E3.** Summary of selected PPG-derived physiomarkers after the preprocessing step in our study.  
79 Abbreviations – F.N.: feature number; Summary statistics: m = mean; p25 = 25th percentile; p75 = 75th percentile; s  
80 = skewness; e = entropy.

| F.N.    | Selected Base Feature (stats)    | Description                | Unit       |
|---------|----------------------------------|----------------------------|------------|
| 114–117 | PPG_AUC_pulse_nu (m, p25, s, e)  | Area under full pulse      | normalized |
| 118     | PPG_AUC_sys_nu (e)               | Systolic AUC complexity    | normalized |
| 119–120 | PPG_AUC_dias_nu (m, e)           | Diastolic AUC              | normalized |
| 121–123 | PPG_AUCow_nu (m, s, e)           | Onset-to-peak AUC          | normalized |
| 124–127 | PPG_AUCwo_nu (m, p25, s, e)      | Peak-to-offset AUC         | normalized |
| 128–131 | PPG_AUCos_nu (m, p25, s, e)      | Onset-to-shoulder AUC      | normalized |
| 132–136 | PPG_AUCso_nu (m, p25, p75, s, e) | Shoulder-to-offset AUC     | normalized |
| 137–138 | PPG_Tsys_ms (m, e)               | Systolic duration          | ms         |
| 139–140 | PPG_Tdias_ms (m, e)              | Diastolic duration         | ms         |
| 141–144 | PPG_T_ow_ms (m, p25, s, e)       | Onset-to-peak time         | ms         |
| 145–146 | PPG_T_wo_ms (s, e)               | Peak-to-offset time        | ms         |
| 147–149 | PPG_T_os_ms (m, s, e)            | Onset-to-shoulder time     | ms         |
| 150–151 | PPG_T_so_ms (s, e)               | Shoulder-to-offset time    | ms         |
| 152–153 | PPG_T_so_cd_ms (s, e)            | Shoulder-to-dicrotic notch | ms         |
| 154–158 | PPG_A_AC (m, p25, p75, s, e)     | Pulsatile amplitude        | a.u.       |
| 159–163 | PPG_A_off (m, p25, p75, s, e)    | Offset amplitude           | a.u.       |
| 164–166 | PPG_A_sp (m, s, e)               | Systolic peak amplitude    | a.u.       |
| 167–169 | PPG_A_dn (m, s, e)               | Dicrotic notch amplitude   | a.u.       |
| 170–172 | PPG_mean_slope_os (m, s, e)      | Mean upstroke slope        | a.u.       |
| 173–175 | PPG_mean_slope_so (m, s, e)      | Mean downstroke slope      | a.u.       |
| 176–177 | PPG_Delta_T_sd (m, e)            | Systolic–diastolic timing  | ms         |
| 178–180 | PPG_RI (m, s, e)                 | Reflection index           | unitless   |

| F.N.    | Selected Base Feature (stats)         | Description                                  | Unit     |
|---------|---------------------------------------|----------------------------------------------|----------|
| 181–183 | PPG_SI (m, s, e)                      | Stiffness index                              | unitless |
| 184–188 | PPG_Delta_A_dn_dp (m, p25, p75, s, e) | DN–DP amplitude difference                   | a.u.     |
| 189–191 | PPG_T_dn_dp_ms (m, s, e)              | DN–DP timing difference                      | ms       |
| 192–194 | PPG_max_upslope (m, s, e)             | Max upstroke slope                           | a.u.     |
| 195–199 | PPG_pat_ms (m, p25, p75, s, e)        | Pulse arrival time                           | ms       |
| 200–204 | PPG_dpat_ms (m, p25, p75, s, e)       | PAT temporal change                          | ms/s     |
| 205–208 | PPG_Delta_A_sp_sp (m, p25, s, e)      | Systolic amplitude change                    | a.u.     |
| 209–210 | PPG_Augmentation_index (p25, e)       | Arterial augmentation index                  | %        |
| 211–212 | PPG_center_freq_ppg_Hz (s, e)         | Spectral center frequency                    | Hz       |
| 213–215 | PPG_mean_ppg (m, s, e)                | Mean PPG pulse                               | a.u.     |
| 216–217 | PPG_variance_ppg (s, e)               | Pulse variance                               | a.u.     |
| 218–220 | PPG_skewness_ppg (m, s, e)            | Distribution asymmetry                       | unitless |
| 221–224 | PPG_kurtosis_ppg (m, p25, s, e)       | Distribution peakedness                      | unitless |
| 225–227 | PPG_entropy_ppg (m, s, e)             | Pulse entropy                                | unitless |
| 228–229 | PPG_energy_ppg (s, e)                 | Pulse energy                                 | a.u.     |
| 230–241 | PPG_PW_10/25/33/50/66/75 (s, e)       | Pulse width metrics                          | ms       |
| 242     | PPG_ppgBeatCenterFreq                 | Dominant beat frequency                      | Hz       |
| 243–245 | PPG_ppgInterbeat_eigval1–3            | Inter-beat eigenvalues                       | unitless |
| 246     | PPG_Ton_off_ms (s)                    | Onset-to-offset pulse width                  | ms       |
| 247–248 | PPG_Tsp_sp_ms (s, e)                  | Peak-to-peak interval between systolic peaks | ms       |
| 249     | PPG_PR (s)                            | Pulse rate variability derived from PPG      | ms       |

81

82

83 **Supplemental Table E4.** Summary of selected RESP-derived physiometers and physiologic covariates after the  
84 preprocessing step in our study. Abbreviations – F.N.: feature number; Summary statistics: m = mean; p25 = 25th  
85 percentile; p75 = 75th percentile; s = skewness; e = entropy.

| F.N.    | Selected Base Feature (stats)           | Description                                    | Unit               |
|---------|-----------------------------------------|------------------------------------------------|--------------------|
| 250–253 | RESP_insp_time (m, p25, s, e)           | Inspiration duration                           | s                  |
| 254–257 | RESP_exp_time (m, p25, s, e)            | Expiration duration                            | s                  |
| 258–262 | RESP_insp_exp_ratio (m, p25, p75, s, e) | I:E ratio                                      | unitless           |
| 263–266 | RESP_resp_width_PPresp_s (m, p25, s, e) | Respiratory cycle width                        | s                  |
| 267–268 | RESP_resp_rate_Bpm (s, e)               | Respiratory rate variability                   | breaths/min        |
| 269     | Binary_sbp                              | Hypotension criterion (SBP $\leq$ 100 mmHg)    | unitless (0/1)     |
| 270     | Binary_rr                               | Tachypnea criterion (RR $\geq$ 22 breaths/min) | unitless (0/1)     |
| 271     | Binary_gcs                              | Altered mentation criterion (GCS <15)          | unitless (0/1)     |
| 272     | Composite_total                         | Composite score related to sbp, rr, ges        | unitless (0/1/2/3) |

86

87

88

89

90 **Supplemental Figure E1:**

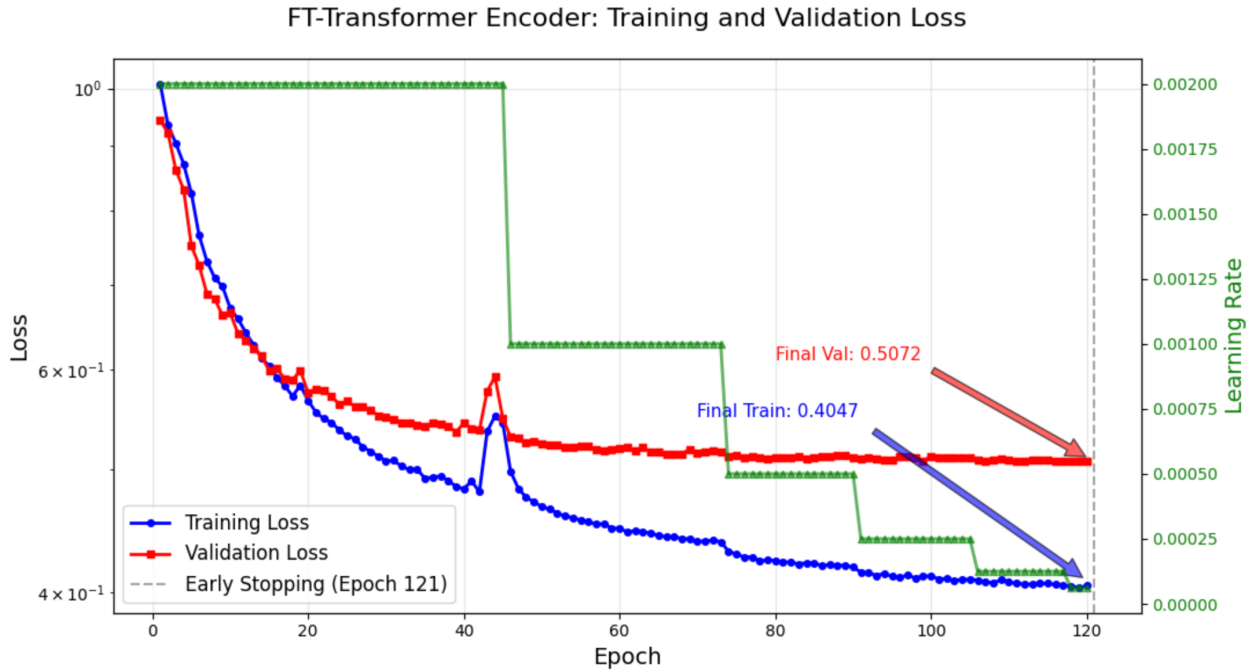

91

92

93

94 **Supplemental Section E1.**

95 **Data Representation or Transformation Techniques for Comparison**

96 1. *No Transformation*: Raw standardized features after pre-processing (272 dimensions) were used directly without  
 97 dimensionality reduction, serving as a baseline for comparison.

98 2. *Principal Component Analysis (PCA)*: Linear dimensionality reduction retained principal components of features  
 99 explaining 90% of cumulative variance in the data†.

100 3. *Deep Variational Autoencoder (DVAE)*: The DVAE employed a symmetric fully connected architecture for  
 101 unsupervised nonlinear representation learning. The encoder network compressed 272-dimensional inputs through  
 102 two progressively narrower dense layers (256→128 units) with ReLU activations, batch normalization  
 103 (momentum=0.99), and dropout regularization (rate=0.1). The encoder produced two 32-dimensional outputs: mean  
 104 ( $\mu$ ) and log-variance ( $\log \sigma^2$ ) vectors parameterizing the latent distribution.

105 Using the reparameterization trick‡, latent samples were drawn as:  $z = \mu + \sigma \odot \varepsilon$ , where  $\varepsilon \sim N(0, I)$ , ensuring  
 106 differentiability for backpropagation. The decoder mirrored the encoder architecture (128→256 units) to reconstruct  
 107 the original 272-dimensional feature space from 32-dimensional latent embeddings. Training minimized a composite  
 108 loss function:

109 
$$L = MSE(x, \hat{x}) + \beta \cdot KL(q(z|x) || p(z))$$

110 where MSE represents mean squared reconstruction error, KL denotes Kullback-Leibler divergence between the  
 111 learned posterior  $q(z|x)$  and prior  $p(z)=N(0,I)$ , and  $\beta$  is a weighting coefficient fixed to 1 throughout training. This  
 112  $\beta$ -VAE formulation encouraged learning disentangled, interpretable latent representations\*.

113 Optimization used the Adam optimizer (learning rate=0.001) with ReduceLRonPlateau scheduling (patience  
 114  $\approx 6$ , factor = 0.5) and early stopping (patience=20, monitoring validation loss). Training ran for a maximum of 200  
 115 epochs with a batch size of 32 and a 90/10 train-validation split. The resulting 32-dimensional DVAE embeddings  
 116 captured nonlinear physiological relationships while preserving critical information for downstream clustering. All  
 117 architectural and optimization parameters were selected to ensure stable training on high-dimensional tabular data.

118 REFERENCE:

119 †: Jolliffe, I. T. & Cadima, J. Principal component analysis: a review and recent developments. *Philos. Trans. R. Soc.*  
 120 *Math. Phys. Eng. Sci.* **374**, 20150202 (2016).

121 ‡: Kingma, D. P. & Welling, M. Auto-Encoding Variational Bayes. Preprint at  
 122 <https://doi.org/10.48550/arXiv.1312.6114> (2022).

123 \*: Higgins, I. *et al.* beta-VAE: Learning Basic Visual Concepts with a Constrained Variational Framework. *ICLR*  
 124 (2017).

125

126 **Supplemental Figure E2.**

**(a) Stability requirement**      **(b) Comparison of consensus matrices obtained by various data transformation approaches**

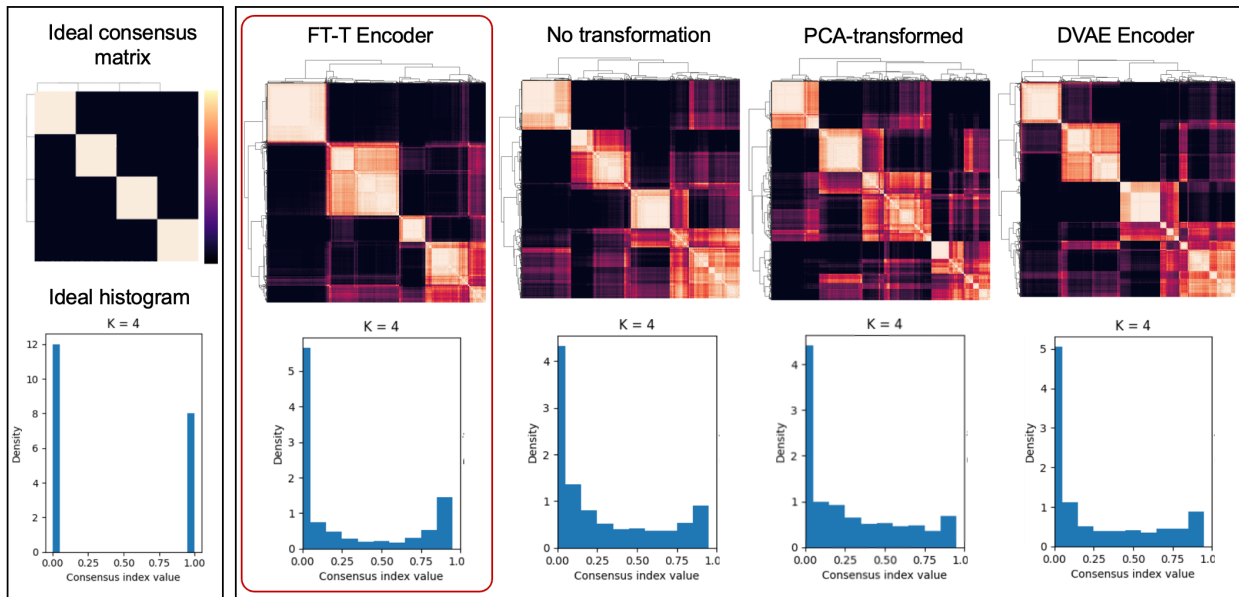

127

Radial Profiles of Demographics and Mortality  
(Phenotypes vs Whole Cohort)

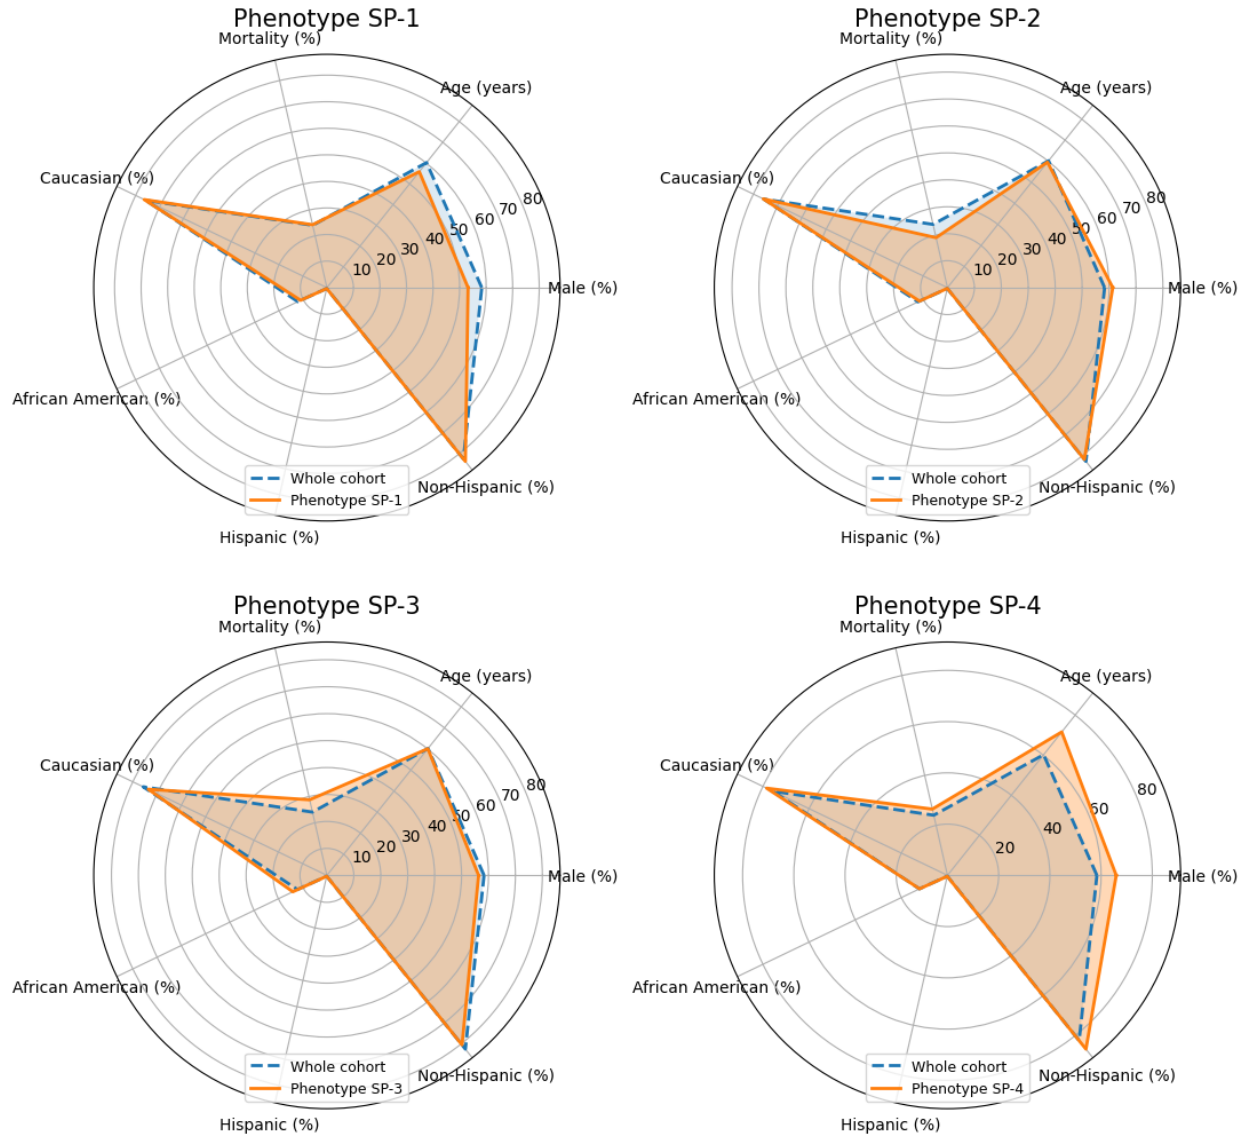

129

130

131

132

133

134

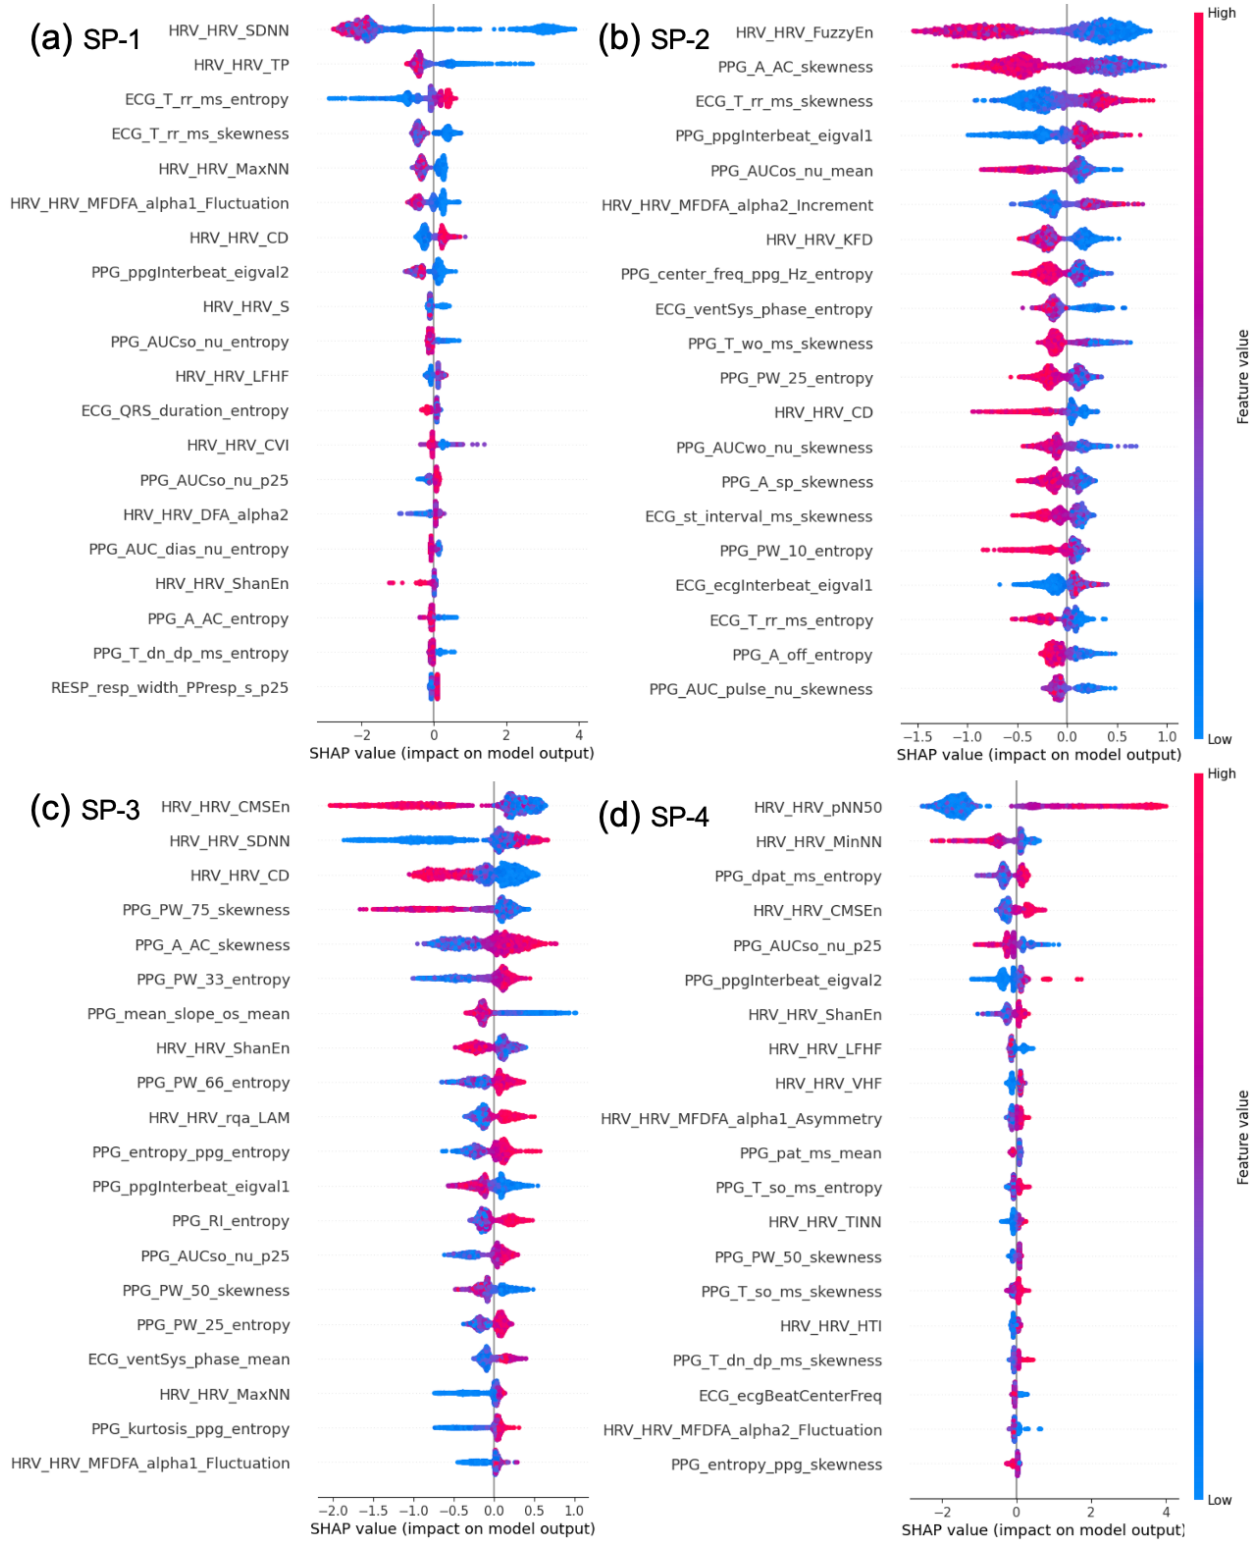

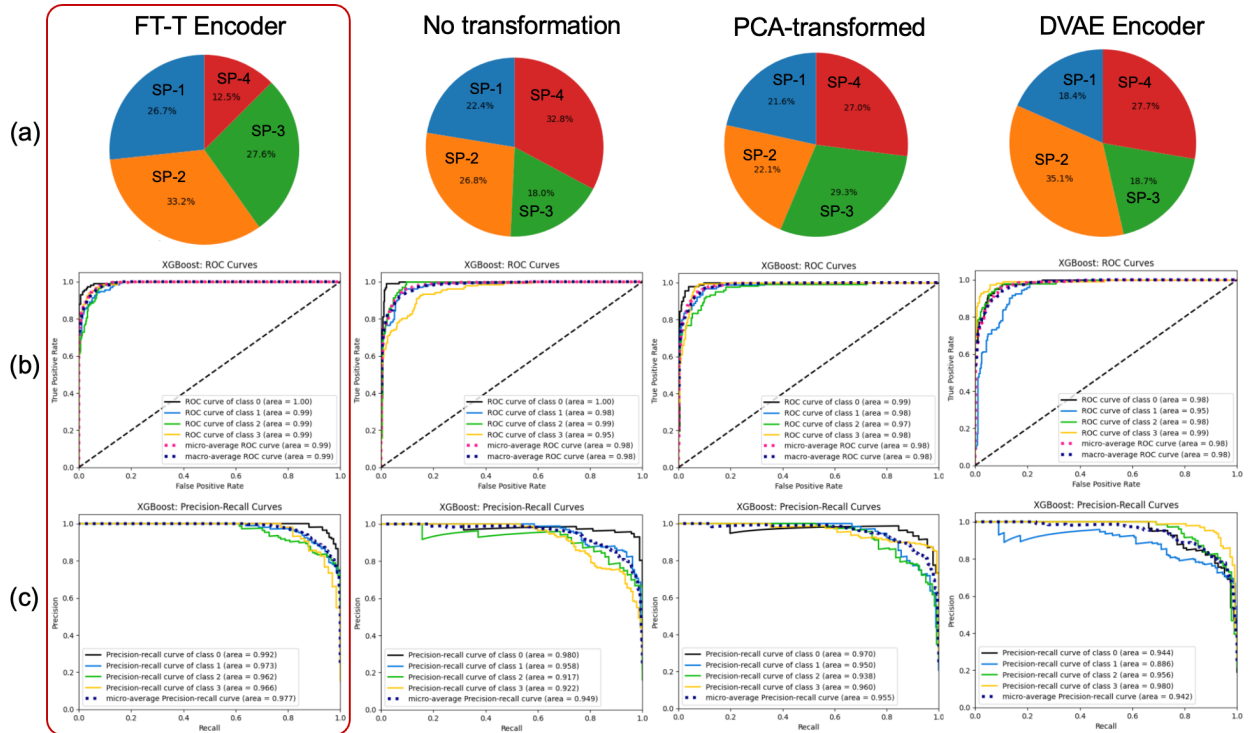

139

140

141

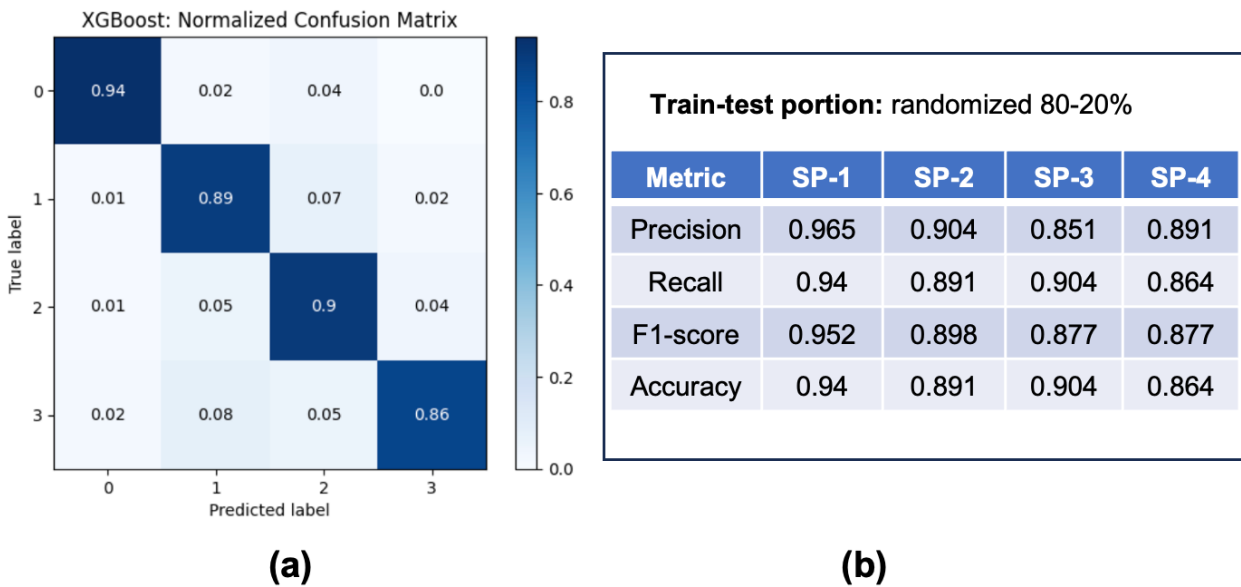

143

144

145 **Supplemental Table E5.** Baseline comorbidity analysis with the Charlson Comorbidity Index (CCI) based on all  
 146 ICD-10 diagnosis codes prior to the zero-point of our study.

| Variable                                | Overall        | SP-1           | SP-2           | SP-3           | SP-4           | p-value |
|-----------------------------------------|----------------|----------------|----------------|----------------|----------------|---------|
| Myocardial infarction                   | 375 (17.4%)    | 97 (16.8%)     | 111 (15.4%)    | 100 (16.8%)    | 67 (24.7%)     | 0.010   |
| Congestive heart failure                | 568 (26.3%)    | 121 (21.0%)    | 179 (24.9%)    | 143 (24.1%)    | 125 (46.1%)    | 0.000   |
| Peripheral vascular disease             | 282 (13.0%)    | 69 (12.0%)     | 77 (10.7%)     | 83 (14.0%)     | 53 (19.6%)     | 0.003   |
| Cerebrovascular disease                 | 335 (15.5%)    | 91 (15.8%)     | 96 (13.4%)     | 103 (17.3%)    | 45 (16.6%)     | 0.221   |
| Dementia                                | 108 (5.0%)     | 20 (3.5%)      | 41 (5.7%)      | 20 (3.4%)      | 27 (10.0%)     | 0.000   |
| Chronic pulmonary disease               | 726 (33.6%)    | 177 (30.7%)    | 258 (35.9%)    | 183 (30.8%)    | 108 (39.9%)    | 0.014   |
| Rheumatologic disease                   | 91 (4.2%)      | 26 (4.5%)      | 31 (4.3%)      | 29 (4.9%)      | 5 (1.8%)       | 0.139   |
| Peptic ulcer disease                    | 119 (5.5%)     | 26 (4.5%)      | 40 (5.6%)      | 40 (6.7%)      | 13 (4.8%)      | 0.381   |
| Mild liver disease                      | 327 (15.1%)    | 89 (15.4%)     | 114 (15.9%)    | 90 (15.2%)     | 34 (12.5%)     | 0.612   |
| Diabetes                                | 821 (38.0%)    | 214 (37.1%)    | 272 (37.8%)    | 203 (34.2%)    | 132 (48.7%)    | 0.001   |
| Diabetes with complications             | 335 (15.5%)    | 81 (14.0%)     | 103 (14.3%)    | 84 (14.1%)     | 67 (24.7%)     | 0.000   |
| Hemiplegia/paraplegia                   | 129 (6.0%)     | 31 (5.4%)      | 41 (5.7%)      | 45 (7.6%)      | 12 (4.4%)      | 0.235   |
| Renal disease                           | 626 (29.0%)    | 149 (25.8%)    | 199 (27.7%)    | 164 (27.6%)    | 114 (42.1%)    | 0.000   |
| Any malignancy                          | 67 (3.1%)      | 21 (3.6%)      | 20 (2.8%)      | 17 (2.9%)      | 9 (3.3%)       | 0.816   |
| Moderate/severe liver disease           | 253 (11.7%)    | 70 (12.1%)     | 93 (12.9%)     | 65 (10.9%)     | 25 (9.2%)      | 0.364   |
| Metastatic solid tumor                  | 79 (3.7%)      | 20 (3.5%)      | 24 (3.3%)      | 23 (3.9%)      | 12 (4.4%)      | 0.854   |
| HIV/AIDS                                | 11 (0.5%)      | 1 (0.2%)       | 3 (0.4%)       | 6 (1.0%)       | 1 (0.4%)       | 0.235   |
| Charlson Comorbidity Index              | 3 (1, 5)       | 2 (1, 5)       | 3 (1, 4)       | 3 (1, 4)       | 4 (2, 6)       | 0.000   |
| Age-adjusted Charlson Comorbidity Index | 5.0 (3.0, 7.0) | 4.0 (2.0, 6.0) | 4.0 (2.0, 6.5) | 5.0 (2.0, 7.0) | 7.0 (5.0, 9.0) | 0.000   |

147

148

149

150

151

152

153

154

155

156

157

158

159 **Supplemental Table E6.** Lab values after sepsis-3 onset up to 24 hours in mean (standard deviation) format.

|                                             | Overall           | SP-1               | SP-2              | SP-3              | SP-4              | P-Value | Test          |
|---------------------------------------------|-------------------|--------------------|-------------------|-------------------|-------------------|---------|---------------|
| n                                           | 2152              | 575                | 713               | 593               | 271               |         |               |
| Albumin_avg_24h_post, mean (SD)             | 2.950 (0.577)     | 2.928 (0.580)      | 2.976 (0.565)     | 2.930 (0.580)     | 2.972 (0.597)     | 0.609   | One-way ANOVA |
| AlkPhos_avg_24h_post, mean (SD)             | 106.047 (120.474) | 111.790 (163.265)  | 107.076 (111.378) | 97.306 (74.168)   | 111.185 (120.764) | 0.437   | One-way ANOVA |
| ALT_avg_24h_post, mean (SD)                 | 119.097 (423.918) | 135.862 (442.246)  | 98.264 (387.101)  | 128.291 (413.561) | 117.730 (501.068) | 0.666   | One-way ANOVA |
| ArterialPh_avg_24h_post, mean (SD)          | 7.354 (0.079)     | 7.346 (0.076)      | 7.361 (0.077)     | 7.351 (0.086)     | 7.364 (0.077)     | 0.103   | One-way ANOVA |
| AST_avg_24h_post, mean (SD)                 | 184.216 (667.374) | 228.506 (755.703)  | 131.339 (440.724) | 202.652 (743.596) | 188.673 (781.546) | 0.254   | One-way ANOVA |
| BaseDeficitArterial_avg_24h_post, mean (SD) | 4.893 (3.884)     | 5.005 (3.563)      | 4.663 (3.773)     | 5.135 (4.334)     | 4.432 (3.487)     | 0.453   | One-way ANOVA |
| Bicarb_avg_24h_post, mean (SD)              | 23.709 (5.458)    | 23.306 (5.189)     | 24.220 (5.589)    | 23.058 (5.273)    | 24.662 (5.827)    | <0.001  | One-way ANOVA |
| BNP_avg_24h_post, mean (SD)                 | 637.323 (823.672) | 522.625 (703.562)  | 540.449 (861.061) | 697.763 (696.109) | 930.515 (991.443) | 0.098   | One-way ANOVA |
| BUN_avg_24h_post, mean (SD)                 | 31.752 (25.279)   | 31.996 (25.389)    | 30.035 (22.936)   | 31.369 (27.665)   | 36.621 (24.950)   | 0.009   | One-way ANOVA |
| Calcium_avg_24h_post, mean (SD)             | 9.125 (0.733)     | 9.052 (0.647)      | 9.167 (0.716)     | 9.068 (0.769)     | 9.302 (0.837)     | 0.055   | One-way ANOVA |
| Chloride_avg_24h_post, mean (SD)            | 103.479 (6.792)   | 103.095 (6.595)    | 103.240 (6.901)   | 104.216 (6.759)   | 103.268 (6.903)   | 0.034   | One-way ANOVA |
| Creatinine_avg_24h_post, mean (SD)          | 1.800 (1.906)     | 1.874 (1.883)      | 1.728 (1.836)     | 1.851 (2.185)     | 1.723 (1.402)     | 0.504   | One-way ANOVA |
| Glucose_avg_24h_post, mean (SD)             | 146.721 (58.411)  | 150.366 (62.099)   | 146.814 (59.371)  | 145.430 (56.918)  | 141.620 (50.323)  | 0.271   | One-way ANOVA |
| Hgb_avg_24h_post, mean (SD)                 | 10.567 (2.242)    | 10.643 (2.271)     | 10.657 (2.310)    | 10.480 (2.194)    | 10.369 (2.100)    | 0.246   | One-way ANOVA |
| iCal_avg_24h_post, mean (SD)                | 1.132 (0.113)     | 1.129 (0.114)      | 1.150 (0.112)     | 1.118 (0.115)     | 1.128 (0.107)     | 0.063   | One-way ANOVA |
| INR_avg_24h_post, mean (SD)                 | 1.714 (1.176)     | 1.757 (1.151)      | 1.609 (1.002)     | 1.699 (1.247)     | 1.915 (1.403)     | 0.051   | One-way ANOVA |
| PT_avg_24h_post, mean (SD)                  | 18.972 (7.895)    | 19.299 (7.921)     | 17.981 (5.577)    | 18.736 (8.204)    | 21.245 (10.867)   | <0.001  | One-way ANOVA |
| Lactate_avg_24h_post, mean (SD)             | 2.330 (2.379)     | 2.343 (2.128)      | 2.083 (1.775)     | 2.631 (3.124)     | 2.230 (2.198)     | 0.016   | One-way ANOVA |
| Neut_perc_avg_24h_post, mean (SD)           | 79.449 (12.753)   | 80.003 (12.155)    | 79.278 (11.988)   | 79.124 (13.356)   | 79.470 (14.382)   | 0.762   | One-way ANOVA |
| PaO2_avg_24h_post, mean (SD)                | 143.634 (70.466)  | 139.627 (65.273)   | 134.224 (68.008)  | 158.989 (74.373)  | 137.994 (72.588)  | <0.001  | One-way ANOVA |
| Platelets_avg_24h_post, mean (SD)           | 202.809 (109.627) | 208.823 (110.782)  | 194.695 (98.083)  | 211.616 (119.902) | 192.192 (110.506) | 0.017   | One-way ANOVA |
| PTT_avg_24h_post, mean (SD)                 | 39.298 (19.715)   | 40.174 (23.777)    | 39.047 (18.665)   | 37.766 (17.708)   | 42.448 (18.717)   | 0.300   | One-way ANOVA |
| Sodium_avg_24h_post, mean (SD)              | 137.435 (5.743)   | 136.956 (5.442)    | 137.405 (5.836)   | 137.730 (5.802)   | 137.864 (5.938)   | 0.109   | One-way ANOVA |
| Bilirubin_total_avg_24h_post, mean (SD)     | 2.108 (4.568)     | 2.178 (5.022)      | 2.481 (5.334)     | 1.782 (3.660)     | 1.667 (2.570)     | 0.131   | One-way ANOVA |
| Troponin_avg_24h_post, mean (SD)            | 81.969 (709.626)  | 131.418 (1146.434) | 119.671 (553.772) | 17.574 (59.642)   | 38.283 (238.335)  | 0.582   | One-way ANOVA |
| WBC_avg_24h_post, mean (SD)                 | 12.769 (7.353)    | 13.933 (8.360)     | 11.898 (6.524)    | 12.740 (7.115)    | 12.704 (7.409)    | <0.001  | One-way ANOVA |
| Potassium_avg_24h_post, mean (SD)           | 4.109 (0.637)     | 4.148 (0.661)      | 4.079 (0.639)     | 4.098 (0.648)     | 4.128 (0.553)     | 0.318   | One-way ANOVA |

160

161

162 **Supplemental Section E2.** Domain-specific prompt supplied to the LLM-based PIA agent for phenotype  
 163 interpretation and generating a concise clinical report.

164 **E2.1:** Main domain-specific prompt and system message used for the LLM-based interpretation.

```

prompt = f"""
Analyze this sepsis physiophenotype based on physiological monitoring data collected 5 minutes
prior to sepsis-3 onset and interpret its physiological state based on sepsis pathophysiology:

CLUSTER DEMOGRAPHICS:
- Number of patients: {n_patients}
- Percentage of cohort: {percentage:.1f}%

TOP DISCRIMINATIVE PHYSIOLOGICAL FEATURES WITH CLINICAL CONTEXT:
{feature_summary}

PHYSIOLOGICAL SYSTEM CONTEXT:
- ECG features: Reflect cardiac electrical activity, systole phases, rhythm, QT prolongation,
T-wave abnormalities and AF
    
```

- HRV features: Indicate autonomic nervous system function and stress response (e.g., ↓ Lower HRV metrics often indicate dysfunction/stress)
- PPG features: Show peripheral circulation, perfusion and arterial stiffness
- Respiratory features: Indicate breathing patterns and respiratory mechanics
- qSOFA features: Clinical proxy for organ dysfunction risk in sepsis (SBP ≤ 100, RR ≥ 22, altered mentation)

#### SEPSIS PATHOPHYSIOLOGY CONSIDERATIONS:

- Autonomic dysfunction is common in sepsis (e.g., ↓ Lower HRV patterns like SDNN, HF power, Complexity measures (S, ShanEn, CD), and DFA alpha indicate impaired autonomic regulation and stress).
- Cardiovascular compromise includes sepsis-induced cardiomyopathy and impaired contractility (ECG features like QT dynamics, QRS changes, arrhythmias).
- Hemodynamic instability & vasodilation come with reduced vascular tone and distributive shock (PPG AC amplitude, pulse arrival time, qSOFA\_sbp, SBP).
- Respiratory dysfunction ranges from compensatory tachypnea to respiratory failure and ARDS (respiratory rate, qSOFA\_rr).
- Vascular & microcirculatory collapse leads to impaired oxygen delivery and poor tissue perfusion (PPG waveform morphology).
- Systemic inflammation affects all physiological systems, contributing to multi-organ dysfunction (qSOFA).
- Compensated autonomic perturbation is an early or stable state of physiological stress, in which the body maintains vital signs within near-normal ranges (e.g., qSOFA = 0) despite underlying autonomic nervous system imbalance (e.g., tachycardia, altered HRV LF/HF ratio, mild tachypnea).

#### IMPORTANT INTERPRETATION GUIDELINES:

- Pay close attention to whether each feature value is "↑ Higher" or "↓ Lower" relative to the overall cohort.
- Use the specific "Clinical meaning" provided for each feature to understand the physiological implication of its change.
- For example, if HRV\_HRV\_SDNN is "↓ Lower values (High importance...)", interpret this as reduced overall HRV and autonomic balance, indicating dysfunction.
- Similarly, if PPG\_A\_sp\_mean is "↑ Higher values", interpret this as higher average systolic pulse amplitude, which might indicate changes in peripheral perfusion or arterial tone depending on the context.

Based on these discriminative physiological patterns (directions and specific clinical meanings), please provide:

1. PHENOTYPE NAME: A clinically meaningful title (4–6 words) that captures the DISTINCTIVE pathophysiological pattern of THIS specific cluster. Focus on the specific combination of HIGH/LOW features mentioned in the 'TOP DISCRIMINATIVE PHYSIOLOGICAL FEATURES' section. For example, if the top features are predominantly ↓ Lower HRV Complexity (S, FuzzyEn) and ↑ Higher PPG Amplitude (A\_AC), the name might be 'Reduced Complexity with Enhanced Pulse Strength'. If top features are ↑ Higher pNN50 (parasympathetic tone) and ↑ Higher HRV\_ShanEn

(complexity), it might be 'Enhanced Parasympathetic Complexity'. Avoid generic terms like "Dysfunction" or "Compromise" if the specific features suggest a more nuanced state.

## 2. PATHOPHYSIOLOGICAL INTERPRETATION:

- What specific sepsis mechanisms does this pattern of HIGHER/LOWER features suggest? Focus on the specific metrics mentioned.
- Which organ systems appear most affected based on the specific features and their changes?
- What does the specific autonomic function pattern (based on detailed HRV metrics) indicate?

## 3. CLINICAL CHARACTERISTICS:

- What would patients in this phenotype likely present with clinically, based on the specific feature changes?
- What hemodynamic profile would be expected?
- What respiratory patterns might be observed?

Format your response with clear section headers and focus on the clinical significance of the specific physiological patterns and their directions.

""""

```
messages=[
{"role": "system", "content": "You are an expert clinical data scientist specializing in sepsis pathophysiology and critical care medicine."},
{"role": "user", "content": prompt}
]
```

165

166 **E2.2:** Detailed clinical contexts of physiometers or physiological features, useful to generate feature\_summary  
167 lines for the SHAP-identified important features.

```
feature_contexts = {
# ECG Features
'T_rr_ms': 'RR interval (successive R-peaks interval) - reflects heart rhythm regularity',
'HR_bpm': 'Heart Rate - primary cardiac vital sign',
'edr_rate_Bpm': 'Respiratory rate estimated from ECG - cardiorespiratory coupling',
'atrialSys_phase': 'Phase of atrial systole - atrial contraction timing',
'ventSys_phase': 'Phase of ventricular systole - ventricular contraction timing',
'P_duration': 'Duration of P wave - atrial depolarization time',
'QRS_duration': 'Duration of QRS complex - ventricular depolarization time',
'T_duration': 'Duration of T wave - ventricular repolarization time',
'pr_interval_ms': 'PR interval - atrioventricular conduction time',
'pr_segment_ms': 'PR segment - atrioventricular conduction segment',
'st_interval_ms': 'ST interval - early ventricular repolarization',
'st_segment_ms': 'ST segment - early ventricular repolarization segment',
'qt_interval_ms': 'QT interval - total ventricular electrical activity',
'qtc_interval_ms': 'Corrected QT interval - heart rate corrected ventricular repolarization',
```

```

'ecgBeatCenterFreq': 'Center frequency of ECG beat – dominant frequency in ECG spectrum',
'ecgInterbeat_eigval1': '1st eigenvalue of interbeat ECG covariance matrix – dominant
interbeat ECG mode',
'ecgInterbeat_eigval2': '2nd eigenvalue of interbeat ECG covariance matrix – secondary
interbeat ECG mode',
'ecgInterbeat_eigval3': '3rd eigenvalue of interbeat ECG covariance matrix – tertiary
interbeat ECG mode',

# HRV Features – RQA
'rqa_REC': 'Recurrence rate from RQA of HRV – probability of repeated states (HRV pattern
repetition)',
'rqa_DET': 'Determinism from RQA of HRV – predictability of HRV patterns',
'rqa_LAM': 'Laminarity from RQA of HRV – presence of laminar phases in HRV dynamics',

# HRV Features – Time Domain
'HRV_MeanNN': 'Mean of NN intervals – average heart rhythm',
'HRV_SDNN': 'Standard deviation of NN intervals – overall HRV, autonomic balance',
'HRV_SDANN1': 'SD of 1-min averages of NN intervals – long-term HRV variability',
'HRV_SDNNI1': 'Mean of 1-min SD of NN intervals – short-term HRV variability',
'HRV_SDANN2': 'SD of 2-min averages of NN intervals – intermediate-term HRV variability',
'HRV_SDNNI2': 'Mean of 2-min SD of NN intervals – short-term HRV variability',
'HRV_SDANN5': 'SD of 5-min averages of NN intervals – intermediate-term HRV variability',
'HRV_SDNNI5': 'Mean of 5-min SD of NN intervals – short-term HRV variability',
'HRV_RMSSD': 'Root mean square of successive differences – short-term HRV, parasympathetic
activity',
'HRV_SSD': 'SD of successive differences – short-term HRV variability',
'HRV_CVNN': 'Coefficient of variation of NN intervals – normalized HRV',
'HRV_CVSD': 'Coefficient of variation of successive differences – normalized short-term HRV',
'HRV_MedianNN': 'Median of NN intervals – median heart rhythm',
'HRV_MadNN': 'Median absolute deviation of NN intervals – robust measure of HRV dispersion',
'HRV_MCVNN': 'Median-based coefficient of variation – normalized HRV based on median',
'HRV_IQRNN': 'Interquartile range of NN intervals – robust measure of HRV range',
'HRV_SDRMSSD': 'Ratio of SDNN to RMSSD – balance between long and short-term variability',
'HRV_Prc20NN': '20th percentile of NN intervals – lower range of heart rhythm',
'HRV_Prc80NN': '80th percentile of NN intervals – upper range of heart rhythm',
'HRV_pNN50': 'Proportion of NN intervals differing by >50ms – parasympathetic tone',
'HRV_pNN20': 'Proportion of NN intervals differing by >20ms – short-term HRV',
'HRV_MinNN': 'Minimum of NN intervals – shortest R-R interval',
'HRV_MaxNN': 'Maximum of NN intervals – longest R-R interval',
'HRV_HTI': 'HRV triangular index – geometric measure of HRV',
'HRV_TINN': 'Triangular interpolation of NN histogram – HRV distribution width',

# HRV Features – Frequency Domain
'HRV_ULF': 'Power in ultra-low frequency band (<0.003 Hz) – long-term regulation',
'HRV_VLF': 'Power in very low frequency band (0.003–0.04 Hz) – thermoregulation, slow
mechanisms',

```

```

'HRV_LF': 'Power in low frequency band (0.04–0.15 Hz) – sympathetic and parasympathetic activity',
'HRV_HF': 'Power in high frequency band (0.15–0.4 Hz) – parasympathetic activity, respiratory sinus arrhythmia',
'HRV_VHF': 'Power in very high frequency band (>0.4 Hz) – very rapid HRV components',
'HRV_TP': 'Total power – overall autonomic activity',
'HRV_LFHF': 'Ratio of LF to HF – sympathovagal balance',
'HRV_LFn': 'Normalized low frequency power – % of LF in total power',
'HRV_HFn': 'Normalized high frequency power – % of HF in total power',
'HRV_LnHF': 'Natural log of HF power – log-transformed parasympathetic activity',

# HRV Features – Poincaré Plot
'HRV_SD1': 'Poincaré plot SD1 – short-term variability, parasympathetic activity',
'HRV_SD2': 'Poincaré plot SD2 – long-term variability, sympathetic activity',
'HRV_SD1SD2': 'Ratio SD1/SD2 – balance between short and long-term variability',
'HRV_S': 'Area of Poincaré ellipse – overall HRV scatter area',
'HRV_CSI': 'Cardiac Sympathetic Index – derived from Poincaré plot (SD2/SD1)',
'HRV_CVI': 'Cardiac Vagal Index – derived from Poincaré plot (SD1^2)',
'HRV_CSI_Modified': 'Modified Cardiac Sympathetic Index – alternative sympathovagal balance measure',
'HRV_PIP': 'Phase-rectified signal average index – non-linear HRV pattern measure',
'HRV_IALS': 'Integral of absolute value of successive differences – cumulative HRV change',
'HRV_PSS': 'Power spectral slope – slope of HRV power spectrum',
'HRV_PAS': 'Power spectral asymmetry – asymmetry of HRV power spectrum',
'HRV_GI': 'Gini index of NN interval distribution – inequality measure of HRV distribution',
'HRV_SI': 'Slope index – derived from Poincaré plot',
'HRV_AI': 'Asymmetry index – derived from Poincaré plot',
'HRV_PI': 'Phase index – derived from Poincaré plot',
'HRV_C1d': 'Chaos-based parameter C1d – chaos measure using derivatives',
'HRV_C1a': 'Chaos-based parameter C1a – chaos measure using amplitudes',
'HRV_SD1d': 'Derivative-based SD1 – Poincaré short-term variability (derivative)',
'HRV_SD1a': 'Amplitude-based SD1 – Poincaré short-term variability (amplitude)',
'HRV_C2d': 'Chaos-based parameter C2d – chaos measure using derivatives',
'HRV_C2a': 'Chaos-based parameter C2a – chaos measure using amplitudes',
'HRV_SD2d': 'Derivative-based SD2 – Poincaré long-term variability (derivative)',
'HRV_SD2a': 'Amplitude-based SD2 – Poincaré long-term variability (amplitude)',
'HRV_Cd': 'Chaos index using derivatives – overall chaos measure',
'HRV_Ca': 'Chaos index using amplitudes – overall chaos measure',
'HRV_SDNNd': 'SDNN based on derivative transformation – HRV variability (derivative)',
'HRV_SDNNa': 'SDNN based on amplitude transformation – HRV variability (amplitude)',

# HRV Features – Fractal & Multifractal
'HRV_DFA_alpha1': 'DFA scaling exponent (short-term) – fractal properties (4–16 beats)',
'HRV_MFDFA_alpha1_Width': 'Width of multifractal spectrum (alpha1) – multifractal variability range (short-term)',
'HRV_MFDFA_alpha1_Peak': 'Peak of multifractal spectrum (alpha1) – dominant multifractal scaling (short-term)',

```

```

'HRV_MFDFA_alpha1_Mean': 'Mean of multifractal spectrum (alpha1) - average multifractal
scaling (short-term)',
'HRV_MFDFA_alpha1_Max': 'Max of multifractal spectrum (alpha1) - maximum multifractal scaling
(short-term)',
'HRV_MFDFA_alpha1_Delta': 'Difference (Max - Min) in multifractal alpha1 - multifractal width
(short-term)',
'HRV_MFDFA_alpha1_Asymmetry': 'Asymmetry of multifractal alpha1 - skewness of spectrum (short-
term)',
'HRV_MFDFA_alpha1_Fluctuation': 'Fluctuation index in multifractal alpha1 - multifractal
fluctuation (short-term)',
'HRV_MFDFA_alpha1_Increment': 'Increment of multifractal alpha1 - multifractal change (short-
term)',
'HRV_DFA_alpha2': 'DFA scaling exponent (long-term) - fractal properties (16+ beats)',
'HRV_MFDFA_alpha2_Width': 'Width of multifractal spectrum (alpha2) - multifractal variability
range (long-term)',
'HRV_MFDFA_alpha2_Peak': 'Peak of multifractal spectrum (alpha2) - dominant multifractal
scaling (long-term)',
'HRV_MFDFA_alpha2_Mean': 'Mean of multifractal spectrum (alpha2) - average multifractal
scaling (long-term)',
'HRV_MFDFA_alpha2_Max': 'Max of multifractal spectrum (alpha2) - maximum multifractal scaling
(long-term)',
'HRV_MFDFA_alpha2_Delta': 'Delta (Max - Min) of alpha2 - multifractal width (long-term)',
'HRV_MFDFA_alpha2_Asymmetry': 'Asymmetry of multifractal alpha2 - skewness of spectrum (long-
term)',
'HRV_MFDFA_alpha2_Fluctuation': 'Fluctuation in alpha2 - multifractal fluctuation (long-
term)',
'HRV_MFDFA_alpha2_Increment': 'Increment in alpha2 - multifractal change (long-term)',

# HRV Features - Nonlinear
'HRV_ApEn': 'Approximate Entropy - signal regularity and complexity',
'HRV_SampEn': 'Sample Entropy - pattern regularity in heart rhythm',
'HRV_ShanEn': 'Shannon Entropy - measure of HRV signal complexity',
'HRV_FuzzyEn': 'Fuzzy Entropy - measure of HRV signal complexity using fuzzy sets',
'HRV_MSEn': 'Multiscale Entropy (mean of scales) - complexity across multiple time scales',
'HRV_CMSEn': 'Composite Multiscale Entropy - refined multiscale complexity measure',
'HRV_RCSEn': 'Refined Composite Multiscale Entropy - advanced multiscale complexity measure',
'HRV_CD': 'Correlation Dimension - measure of HRV attractor complexity',
'HRV_HFD': 'Higuchi Fractal Dimension - measure of HRV signal irregularity',
'HRV_KFD': 'Katz Fractal Dimension - measure of HRV signal complexity',
'HRV_LZC': 'Lempel-Ziv Complexity - measure of HRV signal pattern complexity',
'HRV_MSE_0': 'Multiscale Entropy at scale 0 - complexity at finest scale',
'HRV_MSE_1': 'Multiscale Entropy at scale 1 - complexity at scale 1',
'HRV_MSE_2': 'Multiscale Entropy at scale 2 - complexity at scale 2',
'HRV_MSE_3': 'Multiscale Entropy at scale 3 - complexity at scale 3',
'HRV_MSE_4': 'Multiscale Entropy at scale 4 - complexity at scale 4',
'HRV_MSE_5': 'Multiscale Entropy at scale 5 - complexity at scale 5',
'HRV_MSE_6': 'Multiscale Entropy at scale 6 - complexity at scale 6',

```

```

'HRV_MSE_7': 'Multiscale Entropy at scale 7 - complexity at scale 7',
'HRV_MSE_8': 'Multiscale Entropy at scale 8 - complexity at scale 8',
'HRV_MSE_9': 'Multiscale Entropy at scale 9 - complexity at scale 9',
'HRV_MSE_10': 'Multiscale Entropy at scale 10 - complexity at scale 10',
'HRV_MSE_11': 'Multiscale Entropy at scale 11 - complexity at scale 11',
'HRV_MSE_12': 'Multiscale Entropy at scale 12 - complexity at scale 12',
'HRV_MSE_13': 'Multiscale Entropy at scale 13 - complexity at scale 13',
'HRV_MSE_14': 'Multiscale Entropy at scale 14 - complexity at scale 14',
'HRV_MSE_15': 'Multiscale Entropy at scale 15 - complexity at scale 15',
'HRV_MSE_16': 'Multiscale Entropy at scale 16 - complexity at scale 16',
'HRV_MSE_17': 'Multiscale Entropy at scale 17 - complexity at scale 17',
'HRV_MSE_18': 'Multiscale Entropy at scale 18 - complexity at scale 18',
'HRV_MSE_19': 'Multiscale Entropy at scale 19 - complexity at scale 19',

# PPG Features - Waveform
'PPG_AUC_pulse_nu': 'Area under pulse wave (normalized) - stroke volume surrogate',
'PPG_AUC_sys_nu': 'Area under systolic part (normalized) - systolic blood flow',
'PPG_AUC_dias_nu': 'Area under diastolic part (normalized) - diastolic filling',
'PPG_IPA': 'Inflection point area - arterial stiffness indicator',
'PPG_AUCow_nu': 'AUC onset to wave peak (normalized) - early systolic area',
'PPG_AUCwo_nu': 'AUC wave peak to offset (normalized) - late systolic + diastolic area',
'PPG_AUCos_nu': 'AUC onset to shoulder (normalized) - early systolic + shoulder area',
'PPG_AUCso_nu': 'AUC shoulder to offset (normalized) - shoulder to diastolic area',
'PPG_Tsys_ms': 'Duration of systolic phase - left ventricular ejection time',
'PPG_Tdias_ms': 'Duration of diastolic phase - filling time',
'PPG_Tow_ms': 'Onset to wave peak time - systolic rise time',
'PPG_Two_ms': 'Wave peak to offset time - systolic + early diastolic time',
'PPG_Tos_ms': 'Onset to shoulder time - systolic + shoulder time',
'PPG_Tso_ms': 'Shoulder to offset time - shoulder to early diastolic time',
'PPG_Tso_cd_ms': 'Shoulder to dicrotic notch (or centroid) - dicrotic notch timing',
'PPG_A_AC': 'Amplitude of AC (pulsatile) component - pulse strength',
'PPG_A_off': 'Amplitude at offset - pulse baseline',
'PPG_A_sp': 'Amplitude at shoulder peak - shoulder amplitude',
'PPG_DN_exists': 'Dicrotic notch exists (binary) - presence of dicrotic notch',
'PPG_A_dn': 'Amplitude at dicrotic notch - dicrotic notch amplitude',
'PPG_Ton_off_ms': 'Onset to offset time - total pulse duration',
'PPG_Tsp_sp_ms': 'Shoulder peak to shoulder peak interval - pulse rate indicator',
'PPG_PR': 'Pulse rate from PPG - peripheral heart rate',
'PPG_mean_slope_os': 'Mean slope from onset to shoulder - early systolic upstroke',
'PPG_mean_slope_so': 'Mean slope from shoulder to offset - shoulder to diastolic decay',
'PPG_Delta_T_sd': 'Time difference between systolic and diastolic peak - peak timing diff',
'PPG_RI': 'Reflection Index - arterial stiffness and wave reflection',
'PPG_SI': 'Stiffness Index - large artery stiffness',
'PPG_Delta_A_dn_dp': 'Amplitude diff between dicrotic notch & diastolic peak - dicrotic amp diff',
'PPG_T_dn_dp_ms': 'Time diff between dicrotic notch & diastolic peak - dicrotic time diff',
'PPG_ppg_class': 'Pulse wave morphology class - categorical shape descriptor',

```

```

'PPG_max_upslope': 'Maximum slope in rising edge - systolic upstroke steepness',
'PPG_pat_ms': 'Pulse arrival time - arterial stiffness and blood pressure',
'PPG_dpat_ms': 'Derivative of PAT over time - change in pulse arrival',
'PPG_Delta_A_sp_sp': 'Amplitude difference between shoulder peaks - shoulder amp variability',
'PPG_Augmentation_index': 'Measure of arterial stiffness - pressure wave augmentation',
'PPG_center_freq_ppg_Hz': 'Center frequency of PPG spectrum - dominant frequency in PPG',
'PPG_mean_ppg': 'Mean of raw PPG signal - average PPG level',
'PPG_median_ppg': 'Median of raw PPG signal - median PPG level',
'PPG_variance_ppg': 'Variance of PPG - PPG signal variability',
'PPG_skewness_ppg': 'Skewness of PPG distribution - PPG signal asymmetry',
'PPG_kurtosis_ppg': 'Kurtosis of PPG distribution - PPG signal peakedness',
'PPG_std_ppg': 'Standard deviation of PPG - PPG signal dispersion',
'PPG_entropy_ppg': 'Entropy of PPG - PPG signal complexity',
'PPG_energy_ppg': 'Energy of PPG signal - total power of PPG',
'PPG_PW_10': 'Pulse width at 10% amplitude - pulse width measure',
'PPG_PW_25': 'Pulse width at 25% amplitude - pulse width measure',
'PPG_PW_33': 'Pulse width at 33% amplitude - pulse width measure',
'PPG_PW_50': 'Pulse width at 50% amplitude - pulse width measure (FWHM)',
'PPG_PW_66': 'Pulse width at 66% amplitude - pulse width measure',
'PPG_PW_75': 'Pulse width at 75% amplitude - pulse width measure',
'PPG_ppgBeatCenterFreq': 'Dominant frequency in PPG beats - dominant frequency in PPG
spectrum',
'PPG_ppgInterbeat_eigval1': '1st eigenvalue of inter-beat PPG matrix - dominant interbeat PPG
mode',
'PPG_ppgInterbeat_eigval2': '2nd eigenvalue of inter-beat PPG matrix - secondary interbeat PPG
mode',
'PPG_ppgInterbeat_eigval3': '3rd eigenvalue of inter-beat PPG matrix - tertiary interbeat PPG
mode',

# Respiratory Features
'RESP_insp_time': 'Inspiration time - respiratory muscle function',
'RESP_exp_time': 'Expiration time - respiratory mechanics',
'RESP_insp_exp_ratio': 'I:E ratio - breathing pattern efficiency',
'RESP_resp_width_PPresp_s': 'Width of P-P respiratory cycle - respiratory period',
'RESP_resp_rate_Bpm': 'Respiratory rate - ventilatory status',

# qSOFA Features
'qSOFA_rr': 'qSOFA respiratory rate score - respiratory dysfunction (score 1 if RR >= 22)',
'qSOFA_sbp': 'qSOFA systolic blood pressure score - hemodynamic instability (score 1 if SBP <=
100 mmHg)',
'qSOFA_gcs': 'qSOFA Glasgow Coma Scale score - neurologic dysfunction (score 1 if GCS < 15)',
'qSOFA_total': 'Total qSOFA score (0-3) - sepsis severity indicator (>=2 suggests higher
risk)'
}

```

169 E2.3: Summary lines per phenotype to create consolidated feature\_summary (fed under the LLM prompt) using the  
170 top SHAP features with their directionality information, SHAP values, and feature meanings from feature\_contexts  
171 table.

**Phenotype SP-1:**

```
['1. HRV_HRV_SDNN: ↓ Lower values (High importance, SHAP=2.7727). Clinical meaning: Standard deviation of NN intervals – overall HRV, autonomic balance', '',  
'2. HRV_HRV_TP: ↓ Lower values (Low importance, SHAP=0.5337). Clinical meaning: Total power – overall autonomic activity', '',  
'3. ECG_T_rr_ms_skewness: ↓ Lower values (Low importance, SHAP=0.3830). Clinical meaning: RR interval (successive R-peaks interval) – reflects heart rhythm regularity', '',  
'4. ECG_T_rr_ms_entropy: ↑ Higher values (Low importance, SHAP=0.3819). Clinical meaning: RR interval (successive R-peaks interval) – reflects heart rhythm regularity', '',  
'5. HRV_HRV_CVI: ↓ Lower values (Low importance, SHAP=0.2576). Clinical meaning: Cardiac Vagal Index – derived from Poincaré plot (SD1^2)', '',  
'6. HRV_HRV_MaxNN: ↓ Lower values (Low importance, SHAP=0.2560). Clinical meaning: Maximum of NN intervals – longest R-R interval', '',  
'7. HRV_HRV_MFDFA_alpha1_Fluctuation: ↓ Lower values (Low importance, SHAP=0.2463). Clinical meaning: Fluctuation index in multifractal alpha1 – multifractal fluctuation (short-term)', '',  
'8. HRV_HRV_CD: ↑ Higher values (Low importance, SHAP=0.2349). Clinical meaning: Chaos index using derivatives – overall chaos measure', '',  
'9. PPG_ppgInterbeat_eigval2: ↓ Lower values (Low importance, SHAP=0.2268). Clinical meaning: 2nd eigenvalue of inter-beat PPG matrix – secondary interbeat PPG mode', '',  
'10. HRV_HRV_S: ↓ Lower values (Low importance, SHAP=0.2240). Clinical meaning: Area of Poincaré ellipse – overall HRV scatter area', '']
```

**Phenotype SP-2:**

```
['1. PPG_A_AC_skewness: ↓ Lower values (High importance, SHAP=0.5013). Clinical meaning: Amplitude of AC (pulsatile) component – pulse strength', '',  
'2. HRV_HRV_FuzzyEn: ↓ Lower values (High importance, SHAP=0.4908). Clinical meaning: Fuzzy Entropy – measure of HRV signal complexity using fuzzy sets', '',  
'3. ECG_T_rr_ms_skewness: ↑ Higher values (Moderate importance, SHAP=0.2892). Clinical meaning: RR interval (successive R-peaks interval) – reflects heart rhythm regularity', '',  
'4. HRV_HRV_MFDFA_alpha2_Increment: ↑ Higher values (Moderate importance, SHAP=0.2401). Clinical meaning: Increment in alpha2 – multifractal change (long-term)', '',  
'5. PPG_ppgInterbeat_eigval1: ↑ Higher values (Moderate importance, SHAP=0.2070). Clinical meaning: 1st eigenvalue of inter-beat PPG matrix – dominant interbeat PPG mode', '',  
'6. PPG_AUCos_nu_mean: ↓ Lower values (Moderate importance, SHAP=0.2045). Clinical meaning: AUC onset to shoulder (normalized) – early systolic + shoulder area', '',  
'7. HRV_HRV_KFD: ↓ Lower values (Moderate importance, SHAP=0.1980). Clinical meaning: Katz Fractal Dimension – measure of HRV signal complexity', '',  
'8. PPG_T_wo_ms_skewness: ↓ Lower values (Moderate importance, SHAP=0.1789). Clinical meaning: Wave peak to offset time – systolic + early diastolic time', '',  
'9. ECG_ventSys_phase_entropy: ↓ Lower values (Moderate importance, SHAP=0.1761). Clinical meaning: Phase of ventricular systole – ventricular contraction timing', '',  
'10. PPG_center_freq_ppg_Hz_entropy: ↓ Lower values (Moderate importance, SHAP=0.1689). Clinical meaning: Center frequency of PPG spectrum – dominant frequency in PPG', '']
```

**Phenotype SP-3:**

[ '1. HRV\_HRV\_CMSEn: ↓ Lower values (High importance, SHAP=0.4897). Clinical meaning: Composite Multiscale Entropy – refined multiscale complexity measure', '',  
'2. HRV\_HRV\_SDNN: ↑ Higher values (High importance, SHAP=0.3490). Clinical meaning: Standard deviation of NN intervals – overall HRV, autonomic balance', '',  
'3. PPG\_A\_AC\_skewness: ↑ Higher values (Moderate importance, SHAP=0.3170). Clinical meaning: Amplitude of AC (pulsatile) component – pulse strength', '',  
'4. PPG\_mean\_slope\_os\_mean: ↓ Lower values (Moderate importance, SHAP=0.2770). Clinical meaning: Mean slope from onset to shoulder – early systolic upstroke', '',  
'5. HRV\_HRV\_CD: ↓ Lower values (Moderate importance, SHAP=0.2683). Clinical meaning: Chaos index using derivatives – overall chaos measure', '',  
'6. PPG\_PW\_75\_skewness: ↓ Lower values (Moderate importance, SHAP=0.2243). Clinical meaning: Pulse width at 75% amplitude – pulse width measure', '',  
'7. HRV\_HRV\_ShanEn: ↓ Lower values (Moderate importance, SHAP=0.2045). Clinical meaning: Area of Poincaré ellipse – overall HRV scatter area', '',  
'8. PPG\_ppgInterbeat\_eigval1: ↓ Lower values (Moderate importance, SHAP=0.1937). Clinical meaning: 1st eigenvalue of inter-beat PPG matrix – dominant interbeat PPG mode', '',  
'9. PPG\_PW\_33\_entropy: ↑ Higher values (Moderate importance, SHAP=0.1913). Clinical meaning: Pulse width at 33% amplitude – pulse width measure', '',  
'10. HRV\_HRV\_rqa\_LAM: ↑ Higher values (Moderate importance, SHAP=0.1828). Clinical meaning: Laminarity from RQA of HRV – presence of laminar phases in HRV dynamics', '' ]

**Phenotype SP-4:**

[ '1. HRV\_HRV\_pNN50: ↑ Higher values (High importance, SHAP=3.0968). Clinical meaning: Proportion of NN intervals differing by >50ms – parasympathetic tone', '',  
'2. HRV\_HRV\_MinNN: ↓ Lower values (Low importance, SHAP=0.4479). Clinical meaning: Minimum of NN intervals – shortest R-R interval', '',  
'3. PPG\_AUCso\_nu\_p25: ↓ Lower values (Low importance, SHAP=0.3597). Clinical meaning: AUC shoulder to offset (normalized) – shoulder to diastolic area', '',  
'4. PPG\_ppgInterbeat\_eigval2: ↑ Higher values (Low importance, SHAP=0.2685). Clinical meaning: 2nd eigenvalue of inter-beat PPG matrix – secondary interbeat PPG mode', '',  
'5. HRV\_HRV\_CMSEn: ↑ Higher values (Low importance, SHAP=0.2600). Clinical meaning: Composite Multiscale Entropy – refined multiscale complexity measure', '',  
'6. PPG\_dpat\_ms\_entropy: ↑ Higher values (Low importance, SHAP=0.2507). Clinical meaning: Derivative of PAT over time – change in pulse arrival', '',  
'7. HRV\_HRV\_ShanEn: ↑ Higher values (Low importance, SHAP=0.1937). Clinical meaning: Area of Poincaré ellipse – overall HRV scatter area', '',  
'8. HRV\_HRV\_LFHF: ↓ Lower values (Low importance, SHAP=0.1379). Clinical meaning: Power in low frequency band (0.04–0.15 Hz) – sympathetic and parasympathetic activity', '',  
'9. HRV\_HRV\_TINN: ↑ Higher values (Low importance, SHAP=0.1233). Clinical meaning: Triangular interpolation of NN histogram – HRV distribution width', '',  
'10. HRV\_HRV\_MFDFA\_alpha1\_Asymmetry: ↑ Higher values (Low importance, SHAP=0.1169). Clinical meaning: Asymmetry of multifractal alpha1 – skewness of spectrum (short-term)', '' ]

173  
174

**Supplemental Table E7.** Phenotype characterization provided by the LLM-based PIA agent on phenotype name, interpretation, and clinical characteristics using OpenAI's GPT-4o base model.

## Phenotype SP-1:

**1. PHENOTYPE NAME:** "Reduced Autonomic Variability with Cardiac Irregularity"

**2. PATHOPHYSIOLOGICAL INTERPRETATION:**

- **Sepsis Mechanisms:**
  - The pattern of lower HRV metrics (e.g., HRV\_HRV\_SDNN, HRV\_HRV\_TP, HRV\_HRV\_CVI) suggests significant autonomic dysfunction, likely due to sepsis-induced stress and inflammation affecting the autonomic nervous system. This is indicative of impaired autonomic regulation and a reduced ability to adapt to physiological stressors.
  - The higher entropy in RR intervals (ECG\_T\_rr\_ms\_entropy) alongside lower skewness (ECG\_T\_rr\_ms\_skewness) suggests irregular heart rhythms, potentially due to sepsis-induced myocardial dysfunction or arrhythmias.
  - The increased chaos index (HRV\_HRV\_CD) further supports the presence of cardiac electrical instability.
- **Affected Organ Systems:**
  - **Cardiovascular System:** The combination of reduced HRV and irregular heart rhythms points to significant cardiovascular compromise, likely involving both autonomic dysregulation and direct myocardial effects.
  - **Autonomic Nervous System:** The reduced HRV metrics indicate a blunted autonomic response, with potential dominance of sympathetic over parasympathetic activity.
- **Autonomic Function Pattern:**
  - The specific HRV metrics suggest a state of autonomic imbalance, characterized by reduced parasympathetic (vagal) activity and potentially increased sympathetic tone, reflecting a stress response to sepsis.

**3. CLINICAL CHARACTERISTICS:**

- **Clinical Presentation:** Patients in this phenotype may present with signs of autonomic instability, such as tachycardia, irregular heartbeats, and possibly arrhythmias. They may exhibit symptoms of cardiovascular compromise, including hypotension or signs of distributive shock.
- **Hemodynamic Profile:** Likely to show signs of hemodynamic instability, with potential for low blood pressure and poor perfusion due to reduced vascular tone and cardiac output.
- **Respiratory Patterns:** Patients may exhibit compensatory tachypnea as a response to metabolic acidosis or hypoperfusion, although specific respiratory features are not highlighted in this cluster.

## Phenotype SP-2:

1. **PHENOTYPE NAME:** "Reduced Complexity with Altered Cardiac Rhythm"

### 2. PATHOPHYSIOLOGICAL INTERPRETATION:

- **Sepsis Mechanisms:**
  - The pattern of lower HRV metrics such as Fuzzy Entropy and Katz Fractal Dimension suggests significant autonomic dysfunction, likely due to impaired autonomic regulation and increased physiological stress. This is common in sepsis, where systemic inflammation and stress responses disrupt normal autonomic balance.
  - Higher skewness in RR intervals indicates irregular heart rhythms, which may reflect sepsis-induced cardiomyopathy or arrhythmias, contributing to cardiovascular instability.
  - Lower PPG features such as AC skewness and AUC onset to shoulder suggest compromised peripheral circulation and reduced vascular tone, indicative of hemodynamic instability and potential distributive shock.
- **Affected Organ Systems:**
  - **Cardiovascular System:** The combination of altered HRV and ECG features points to significant cardiovascular compromise, including potential arrhythmias and impaired contractility.
  - **Autonomic Nervous System:** The reduced complexity in HRV metrics indicates autonomic dysfunction, a hallmark of sepsis pathophysiology.
  - **Peripheral Circulation:** Lower PPG features suggest impaired perfusion and vascular tone, affecting microcirculatory function.
- **Autonomic Function Pattern:**
  - The specific HRV metrics indicate a state of autonomic imbalance with reduced complexity, suggesting a shift towards sympathetic dominance or reduced parasympathetic activity, common in sepsis-related stress responses.

### 3. CLINICAL CHARACTERISTICS:

- **Clinical Presentation:** Patients may present with signs of cardiovascular instability, such as arrhythmias or irregular heartbeats, and symptoms of poor peripheral perfusion, such as cool extremities or delayed capillary refill.
- **Hemodynamic Profile:** Expect signs of distributive shock, including hypotension and reduced vascular resistance, potentially requiring vasopressor support.
- **Respiratory Patterns:** While specific respiratory features are not highlighted, compensatory tachypnea may be present as a response to metabolic acidosis or hypoperfusion.

## Phenotype SP-3:

1. **PHENOTYPE NAME:** "Reduced Complexity with Altered Pulse Dynamics"

## 2. PATHOPHYSIOLOGICAL INTERPRETATION:

- **Sepsis Mechanisms:**
  - The pattern of lower HRV complexity measures (HRV\_HRV\_CMSEn, HRV\_HRV\_CD, HRV\_HRV\_ShanEn) suggests significant autonomic dysfunction, likely due to impaired autonomic regulation and increased physiological stress. This is common in sepsis, where systemic inflammation and stress responses disrupt normal autonomic control.
  - Higher HRV\_HRV\_SDNN indicates a paradoxical increase in overall HRV, which might reflect compensatory autonomic responses or variability due to arrhythmias.
  - Altered PPG features (e.g., increased PPG\_A\_AC\_skewness and decreased PPG\_mean\_slope\_os\_mean) suggest changes in peripheral circulation, possibly due to vasodilation and altered arterial stiffness, common in sepsis-induced hemodynamic instability.
- **Affected Organ Systems:**
  - **Cardiovascular System:** The combination of HRV and PPG changes indicates significant cardiovascular involvement, with potential impacts on heart rate variability and peripheral perfusion.
  - **Autonomic Nervous System:** The reduced complexity in HRV metrics points to autonomic dysregulation, a hallmark of sepsis pathophysiology.
- **Autonomic Function Pattern:**
  - The specific HRV pattern, with reduced complexity and increased SDNN, suggests a state of autonomic imbalance where compensatory mechanisms are active but potentially overwhelmed by systemic stress and inflammation.

## 3. CLINICAL CHARACTERISTICS:

- **Clinical Presentation:** Patients may present with signs of autonomic dysfunction, such as tachycardia, and potentially arrhythmias due to the altered HRV metrics. Peripheral signs might include altered pulse strength and variability, reflecting changes in vascular tone and perfusion.
- **Hemodynamic Profile:** Expect hemodynamic instability characterized by potential hypotension due to vasodilation and altered vascular resistance. The increased pulse amplitude skewness suggests variability in pulse strength, possibly indicating fluctuating perfusion pressures.
- **Respiratory Patterns:** Respiratory patterns may include compensatory tachypnea, as the body attempts to manage oxygen delivery and CO<sub>2</sub> clearance in the face of systemic stress.

## Phenotype SP-4:

1. PHENOTYPE NAME: "Enhanced Parasympathetic Complexity with Altered Perfusion"

## 2. PATHOPHYSIOLOGICAL INTERPRETATION:

- **Sepsis Mechanisms:**
  - The pattern of higher HRV metrics such as HRV\_HRV\_pNN50, HRV\_HRV\_CMSEn, and HRV\_HRV\_ShanEn suggests an enhanced parasympathetic tone and increased complexity in

heart rate variability. This may indicate a compensatory autonomic response to stress or early sepsis, where the body attempts to maintain homeostasis.

- Lower HRV\_HRV\_LFHF indicates a reduced sympathetic activity relative to parasympathetic activity, which could reflect an imbalance in autonomic regulation often seen in sepsis.
- The lower PPG\_AUCso\_nu\_p25 and higher PPG\_ppgInterbeat\_eigval2 suggest altered peripheral perfusion and potential changes in arterial stiffness or vascular tone, possibly due to systemic inflammation and microcirculatory dysfunction.
- **Affected Organ Systems:**
  - **Autonomic Nervous System:** The HRV patterns indicate significant autonomic involvement, with a shift towards parasympathetic dominance.
  - **Cardiovascular System:** Altered PPG features suggest changes in peripheral circulation and potential hemodynamic instability.
  - **Microcirculation:** Impaired perfusion and vascular tone changes are suggested by PPG metrics.
- **Autonomic Function Pattern:**
  - The autonomic function pattern, characterized by higher parasympathetic activity and complexity, suggests a state of compensated autonomic perturbation. This may represent an early or stable phase of sepsis where the body is actively trying to counteract stressors.

### 3. CLINICAL CHARACTERISTICS:

- **Clinical Presentation:** Patients may present with signs of autonomic imbalance, such as mild tachycardia or bradycardia, and potentially normal or slightly altered blood pressure due to compensatory mechanisms. They might exhibit signs of altered perfusion, such as cool extremities or delayed capillary refill, despite normal vital signs.
- **Hemodynamic Profile:** Expect a profile of relative hemodynamic stability with potential subtle signs of reduced vascular tone or early distributive shock.
- **Respiratory Patterns:** Respiratory patterns may include mild tachypnea as a compensatory response, but without overt respiratory distress or failure at this stage.

175

176

177 **Supplemental Section E3.**

178 **HRV Magnitude Versus Complexity as Distinct Physiological Constructs in Derived Sepsis Phenotypes**

179 Our findings highlight a critical distinction between HRV magnitude and HRV complexity, demonstrating that these  
180 dimensions capture fundamentally different aspects of cardiovascular regulation. Traditional HRV metrics such as  
181 SDNN, RMSSD, pNN50, and total power quantify the amplitude of beat-to-beat variability but are insufficient to  
182 characterize the structure or adaptability of autonomic control. In our cohort, groups SP-2 and SP-3 exhibited moderate  
183 to very high HRV magnitude, yet both showed markedly reduced nonlinear complexity, as evidenced by low

184 correlation dimension and suppressed composite multiscale entropy. This pattern indicates large but predictable  
185 fluctuations driven by a limited number of regulatory mechanisms, reflecting autonomic entrainment rather than  
186 physiological resilience. In contrast, group SP-4 demonstrated not only elevated HRV magnitude but also preserved  
187 multiscale complexity, consistent with rich, high-dimensional interactions among vagal, baroreflex, and peripheral  
188 vascular control loops. Importantly, group SP-1 further illustrates that apparent increases in entropy or dimensionality  
189 may arise from nonstationarity or instability in the setting of profound autonomic suppression, underscoring the need  
190 to interpret complexity metrics alongside HRV magnitude and physiological context. Collectively, these results show  
191 that high HRV magnitude alone does not equate to cardiovascular health; rather, the concurrent presence of high  
192 variability and preserved nonlinear complexity defines a super-normal, resilient autonomic–hemodynamic phenotype,  
193 with important implications for risk stratification and mechanistic phenotyping in sepsis and critical illness.

194

#### 195 **Supplemental Section E4.**

#### 196 **Physiological Scope of PPG-Derived Features:**

197 Photoplethysmography captures peripheral arterial pulsatile dynamics reflecting macrocirculatory arteriolar behavior,  
198 including arterial wall stiffness, pulsatile perfusion strength (AC amplitude), beat-to-beat pulse variability, and pulse  
199 wave transit time [Allen 2007]. While these metrics provide insights into peripheral vascular tone and arteriolar  
200 dynamics, they do not directly assess capillary-level microcirculation, which would require sublingual video  
201 microscopy or handheld vital microscopy [Ince 2018]. Therefore, references to ‘peripheral vascular’ or ‘arteriolar’  
202 dynamics in this study reflect PPG-measurable macrocirculatory parameters, whereas inferences about  
203 microcirculatory function represent mechanistic hypotheses requiring future validation with direct microcirculatory  
204 imaging.

#### 205 REFERENCES:

206 [Allen 2007] Allen J. Photoplethysmography and its application in clinical physiological measurement. *Physiol Meas.*  
207 2007;28(3):R1–R39.

208 [Ince 2018] Ince C. et al. Second consensus on the assessment of sublingual microcirculation in critically ill patients.  
209 *Intensive Care Med.* 2018;44(3):281–299.
